# Supplementary material for: Transport of Non-Steroidal Anti-Inflammatory Drugs across an Oral Mucosa Epithelium In Vitro Model
Source: MDPI journal article supplement (doi:10.3390/pharmaceutics16040543), 2024-04-15
Supplement: s1 [file s1]

**Table S1.** Overview of PS values (blank, all: cell + blank, cell) and permeability values of cell (PC) and cell + blank (PE) from transport studies with NSAIDs, diazepam and carboxyfluorescein (CF) with and without inhibitor (verapamil, probenecid) as well as measured TEER values at beginning of experiments. Results shown as mean  $\pm$  SD from three independent experiments (N=4-8). Significances compared to PC or PE values of diazepam values per experiments.

|            |               |            | PS blank<br>[ $\mu$ L/min] | PS all<br>[ $\mu$ L/min] | PS cell<br>[ $\mu$ L/min] | PC<br>[ $\mu$ m/min] | PE [ $\mu$ m/min]  | TEER<br>[ $\Omega$ *cm <sup>2</sup> ] |
|------------|---------------|------------|----------------------------|--------------------------|---------------------------|----------------------|--------------------|---------------------------------------|
| Celecoxib  | w/o Inhibitor | Diazepam   | 0.18 $\pm$ 0.003           | 0.11 $\pm$ 0.02          | 0.38 $\pm$ 0.19           | 11.44 $\pm$ 5.76     | 3.40 $\pm$ 0.70    | 201.35 $\pm$ 42.35                    |
|            |               | CF         | 0.89 $\pm$ 0.08            | 0.13 $\pm$ 0.03          | 0.15 $\pm$ 0.04           | 4.38 $\pm$ 1.12*     | 3.74 $\pm$ 0.85    |                                       |
|            |               | Celecoxib  | 0.06 $\pm$ 0.03            | 0.01 $\pm$ 0.005         | 0.01 $\pm$ 0.006          | 0.44 $\pm$ 0.19***   | 0.36 $\pm$ 0.15*** |                                       |
|            | Verapamil     | Diazepam   | 0.13 $\pm$ 0.05            | 0.09 $\pm$ 0.05          | 0.41 $\pm$ 0.35           | 12.29 $\pm$ 10.31    | 2.82 $\pm$ 1.46    | 185.56 $\pm$ 24.59                    |
|            |               | CF         | 0.77 $\pm$ 0.06            | 0.14 $\pm$ 0.03          | 0.18 $\pm$ 0.04           | 5.33 $\pm$ 1.19*     | 4.31 $\pm$ 0.83**  |                                       |
|            |               | Celecoxib  | 0.09 $\pm$ 0.03            | 0.03 $\pm$ 0.03          | 0.07 $\pm$ 0.08           | 2.1 $\pm$ 2.24**     | 1.00 $\pm$ 0.77**  |                                       |
|            | Probenecid    | Diazepam   | 0.20 $\pm$ 0.004           | 0.14 $\pm$ 0.004         | 0.46 $\pm$ 0.04           | 13.74 $\pm$ 1.17     | 4.08 $\pm$ 0.11    | 243.18 $\pm$ 88.75                    |
|            |               | CF         | 0.97 $\pm$ 0.04            | 0.14 $\pm$ 0.03          | 0.16 $\pm$ 0.05           | 4.76 $\pm$ 1.36*     | 4.06 $\pm$ 1.02    |                                       |
|            |               | Celecoxib  | 0.10 $\pm$ 0.05            | 0.05 $\pm$ 0.04          | 0.33 $\pm$ 0.36           | 6.05 $\pm$ 6.014*    | 1.63 $\pm$ 1.13*** |                                       |
| Diclofenac | w/o Inhibitor | Diazepam   | 0.17 $\pm$ 0.01            | 0.11 $\pm$ 0.03          | 0.44 $\pm$ 0.35           | 13.01 $\pm$ 10.37    | 3.14 $\pm$ 0.95    | 246.79 $\pm$ 79.55                    |
|            |               | CF         | 0.87 $\pm$ 0.17            | 0.14 $\pm$ 0.02          | 0.16 $\pm$ 0.04           | 4.89 $\pm$ 1.12**    | 4.05 $\pm$ 0.73    |                                       |
|            |               | Diclofenac | 0.18 $\pm$ 0.02            | 0.07 $\pm$ 0.01          | 0.12 $\pm$ 0.03           | 3.64 $\pm$ 0.84**    | 2.11 $\pm$ 0.22    |                                       |
|            | Verapamil     | Diazepam   | 0.13 $\pm$ 0.03            | 0.1 $\pm$ 0.03           | 0.68 $\pm$ 0.69           | 7.56 $\pm$ 1.51      | 2.87 $\pm$ 0.91    | 178 $\pm$ 55.18                       |
|            |               | CF         | 0.85 $\pm$ 0.19            | 0.12 $\pm$ 0.02          | 0.14 $\pm$ 0.03           | 4.16 $\pm$ 0.81      | 3.54 $\pm$ 0.63*   |                                       |
|            |               | Diclofenac | 0.17 $\pm$ 0.01            | 0.07 $\pm$ 0.01          | 0.12 $\pm$ 0.03           | 3.54 $\pm$ 0.94      | 2.06 $\pm$ 0.3     |                                       |
|            | Probenecid    | Diazepam   | 0.15 $\pm$ 0.03            | 0.12 $\pm$ 0.01          | 0.57 $\pm$ 0.21           | 16.88 $\pm$ 6.19     | 3.47 $\pm$ 0.3     | 218.4 $\pm$ 52.1                      |
|            |               | CF         | 0.98 $\pm$ 0.48            | 0.15 $\pm$ 0.03          | 0.19 $\pm$ 0.05           | 5.65 $\pm$ 1.51***   | 4.59 $\pm$ 1.04    |                                       |
|            |               | Diclofenac | 0.2 $\pm$ 0.04             | 0.1 $\pm$ 0.05           | 0.22 $\pm$ 0.15           | 6.66 $\pm$ 4.59***   | 2.98 $\pm$ 1.37    |                                       |
| Ibuprofen  | w/o Inhibitor | Diazepam   | 0.21 $\pm$ 0.03            | 0.12 $\pm$ 0.02          | 0.31 $\pm$ 0.08           | 9.23 $\pm$ 2.34      | 3.65 $\pm$ 0.64    | 202.78 $\pm$ 47.09                    |
|            |               | CF         | 0.98 $\pm$ 0.2             | 0.14 $\pm$ 0.05          | 0.17 $\pm$ 0.07           | 4.98 $\pm$ 2.03*     | 4.16 $\pm$ 1.44    |                                       |
|            |               | Ibuprofen  | 0.21 $\pm$ 0.03            | 0.1 $\pm$ 0.01           | 0.19 $\pm$ 0.05           | 5.77 $\pm$ 1.48*     | 2.94 $\pm$ 0.3     |                                       |
|            | Verapamil     | Diazepam   | 0.12 $\pm$ 0.06            | 0.08 $\pm$ 0.02          | 0.39 $\pm$ 0.35           | 7.22 $\pm$ 0.81      | 2.45 $\pm$ 0.68    | 174.94 $\pm$ 33.42                    |
|            |               | CF         | 0.93 $\pm$ 0.14            | 0.14 $\pm$ 0.04          | 0.17 $\pm$ 0.07           | 5.14 $\pm$ 1.98      | 4.21 $\pm$ 1.33*   |                                       |
|            |               | Ibuprofen  | 0.21 $\pm$ 0.02            | 0.11 $\pm$ 0.01          | 0.24 $\pm$ 0.04           | 7.13 $\pm$ 1.24      | 3.27 $\pm$ 0.33    |                                       |
|            | Probenecid    | Diazepam   | 0.14 $\pm$ 0.01            | 0.09 $\pm$ 0.02          | 0.29 $\pm$ 0.16           | 8.65 $\pm$ 4.62      | 2.74 $\pm$ 0.54    | 171.92 $\pm$ 44.76                    |
|            |               | CF         | 1.06 $\pm$ 0.29            | 0.17 $\pm$ 0.05          | 0.21 $\pm$ 0.09           | 6.15 $\pm$ 2.56      | 4.95 $\pm$ 1.46*   |                                       |
|            |               | Ibuprofen  | 0.22 $\pm$ 0.02            | 0.12 $\pm$ 0.03          | 0.26 $\pm$ 0.11           | 7.87 $\pm$ 3.24      | 3.47 $\pm$ 0.76    |                                       |
| Piroxicam  | w/o Inhibitor | Diazepam   | 0.19 $\pm$ 0.02            | 0.12 $\pm$ 0.04          | 0.45 $\pm$ 0.24           | 13.4 $\pm$ 7.01      | 3.71 $\pm$ 1.07    | 183.01 $\pm$ 56.55                    |
|            |               | CF         | 0.91 $\pm$ 0.06            | 0.13 $\pm$ 0.02          | 0.15 $\pm$ 0.02           | 4.38 $\pm$ 0.62***   | 3.77 $\pm$ 0.46    |                                       |
|            |               | Piroxicam  | 0.18 $\pm$ 0.02            | 0.08 $\pm$ 0.03          | 0.16 $\pm$ 0.08           | 4.86 $\pm$ 2.41***   | 2.44 $\pm$ 0.76**  |                                       |
|            | Verapamil     | Diazepam   | 0.09 $\pm$ 0.02            | 0.05 $\pm$ 0.03          | 0.24 $\pm$ 0.36           | 2.97 $\pm$ 2.32      | 1.62 $\pm$ 0.94    | 167.74 $\pm$ 24.09                    |
|            |               | CF         | 0.85 $\pm$ 0.1             | 0.13 $\pm$ 0.01          | 0.15 $\pm$ 0.01           | 4.39 $\pm$ 0.31      | 3.73 $\pm$ 0.2***  |                                       |
|            |               | Piroxicam  | 0.22 $\pm$ 0.03            | 0.1 $\pm$ 0.03           | 0.2 $\pm$ 0.07            | 6.00 $\pm$ 1.99*     | 3.07 $\pm$ 0.79*** |                                       |
|            | Probenecid    | Diazepam   | 0.12 $\pm$ 0.03            | 0.1 $\pm$ 0.01           | 0.32 $\pm$ 0.14           | 9.63 $\pm$ 4.3       | 2.93 $\pm$ 0.26    | 176.59 $\pm$ 52.18                    |
|            |               | CF         | 0.91 $\pm$ 0.09            | 0.15 $\pm$ 0.02          | 0.18 $\pm$ 0.04           | 5.39 $\pm$ 1.13      | 4.46 $\pm$ 0.74**  |                                       |
|            |               | Piroxicam  | 0.18 $\pm$ 0.02            | 0.09 $\pm$ 0.02          | 0.2 $\pm$ 0.06            | 5.81 $\pm$ 1.73      | 2.71 $\pm$ 0.47    |                                       |

## High-throughput (96.96) qPCR chip

Preparation and set-up was described previously in Lin et al. (2020) (1). In short, RNA samples collected at the 48-hour timepoint of the inflammation studies and generated by pooling two cell-grown inserts were tested as duplicates on the expression of 95 markers and 1 negative control (H<sub>2</sub>O). The mRNA samples were amplified with three different primer pools containing 54 primers (PPIA, ACTB, GAPDH, B2M, CLDN1, CLDN2, CLDN3, CLDN4, CLDN5, CLDN6, CLDN7, CLDN8, CLDN9, CLDN10tva, CLDN10tvb, CLDN11, CLDN12tv1, CLDN12tv2, CLDN12tv3, CLDN14, CLDN15, CLDN16, CLDN17, CLDN18tv2a, CLDN19tv1, CLDN20, CLDN21, CLDN22, CLDN24, JAM1, JAM2, JAM3, OCLN, MARVELD2, ZO-1, ZO-2, ZO-3, SLC2A1, SLC7A1, SLC7A5, SLC16A1, ABCB1, ABCC1, ABCC2, ABCC3, ABCC4, ABCC5, ABCG2, INSR, LRP1, TFRC, VEGF-A, CDH5, VWF), 32 primers (CK1, CK4, CK5, CK8, CK10, CK13tv1, CK14, CK16, CK18, CK19, LOR, CDH1, CTNNB1, VIM, MUC1A, MUC1B, MUC3A, MUC5AC, MUC5B, MUC13, MUC15TV2, MUC16, MUC18, MUC20, MUC21, AQP1, AQP3, AQP5, AQP7, AQP9, AQP10, AQP11) or 9 primers (CLDN25tv1-4, CLDN25tv7, CLDN26, CLDN27, MFSD2A, K7, DSG3, AMY $\alpha$ 1B, PECAM1). The nomenclature of claudin follows Mineta et al. (2011) (2). Quality control of generated data excluded Ct measured outside of the marker's melting temperature  $\pm$  1.5 °C. To calculate the relative expression for each marker, the relative quantitative value was first calculated by subtracting the mean Ct values of control samples from the Ct values of treated samples and potentiating the resulting  $\Delta$ Ct by the power of 2 ( $=2^{\Delta\text{Ct}}$ ). The geometric mean of housekeeping genes (ACTB, GAPDH, B2M; PPIA was excluded due to high variances) was calculated for each sample. Next, the relative quantitative value of each marker was divided by the calculated geometric mean of housekeeping genes of the respective sample. Subsequent expression values of treated samples were normalised to expression values of control samples to give n-fold expression, shown in Table S2.

**Table S2.** Overview of mRNA expression after inflammation studies analysed with a high-throughput (96.96) qPCR chip. Tested RNA samples were collected after three independent experiments with 4 treatment groups (Control, INF, INF+Ibu, Ibu) per experiment (N=12). Statistical analysis was performed as two-way ANOVA with post hoc Holm–Sidak test with \* $p < 0.05$ , \*\* $p < 0.01$ , \*\*\* $p < 0.001$  and  $\alpha = 0.05$ . No expressions in all samples of 4 groups were seen for CLDN19tv1, CLDN26, AQP7, CTNNB1, CDH5, MUC5B, MUC13 and MUC16.

|           | Control       |     | INF                          |     | INF+Ibu                              |     | Ibu              |     |
|-----------|---------------|-----|------------------------------|-----|--------------------------------------|-----|------------------|-----|
| Marker    | mean $\pm$ SD | N   | mean $\pm$ SD                | N   | mean $\pm$ SD                        | N   | mean $\pm$ SD    | N   |
| CLDN1     | 1 $\pm$ 0.2   | 3/3 | 0.54 $\pm$ 0.05              | 3/3 | 0.6 $\pm$ 0.48                       | 3/3 | 0.52 $\pm$ 0.71  | 3/3 |
| CLDN2     | 1 $\pm$ 0.01  | 2/3 | 2.63 $\pm$ 1.52              | 3/3 | 1.98 $\pm$ 1.39                      | 3/3 | 5.02             | 1/3 |
| CLDN3     | 1 $\pm$ 0.41  | 3/3 | 1.31 $\pm$ 0.92              | 3/3 | 1.05 $\pm$ 1.14                      | 3/3 | 1.95             | 1/3 |
| CLDN4     | 1 $\pm$ 0.23  | 3/3 | 0.2 $\pm$ 0.1                | 3/3 | 0.35 $\pm$ 0.29                      | 3/3 | 0.74 $\pm$ 1.1   | 3/3 |
| CLDN5     | 1 $\pm$ 0.49  | 3/3 | 2.99 $\pm$ 2.81              | 3/3 | 5.34 $\pm$ 4.14                      | 3/3 | 7.17 $\pm$ 10.76 | 3/3 |
| CLDN6     | 1 $\pm$ 0.48  | 3/3 | 2.72 $\pm$ 1.27              | 3/3 | 3.57 $\pm$ 1.83                      | 3/3 | 1.83 $\pm$ 0.78  | 3/3 |
| CLDN7     | 1 $\pm$ 0.25  | 3/3 | 0.87 $\pm$ 0.11              | 3/3 | 0.77 $\pm$ 0.6                       | 3/3 | 0.51 $\pm$ 0.72  | 3/3 |
| CLDN8     | 1 $\pm$ 0.27  | 3/3 | 0.79 $\pm$ 0.83              | 3/3 | 1.24 $\pm$ 1.26                      | 3/3 | 0.49 $\pm$ 0.46  | 3/3 |
| CLDN9     | 1 $\pm$ 0.44  | 2/3 | 0.96 $\pm$ 0.41              | 2/3 | 1.06 $\pm$ 1.09                      | 3/3 | 1.07 $\pm$ 1.46  | 2/3 |
| CLDN10tva | 1 $\pm$ 0.39  | 3/3 | *Control<br>8.84 $\pm$ 10.73 | 3/3 | ***Control, Ibu<br>14.19 $\pm$ 14.45 | 3/3 | 1.49 $\pm$ 2.21  | 3/3 |
| CLDN10tvb | 1             | 1/3 | 5.18 $\pm$ 6.41              | 3/3 | 8.73 $\pm$ 6.94                      | 2/3 | n/a              | 0/3 |
| CLDN11    | 1 $\pm$ 0.28  | 3/3 | 0.58 $\pm$ 0.02              | 3/3 | 0.47 $\pm$ 0.19                      | 3/3 | 0.6 $\pm$ 0.1    | 3/3 |
| CLDN12tv1 | 1 $\pm$ 0.62  | 3/3 | 2.74 $\pm$ 0.54              | 3/3 | 2.27 $\pm$ 0.67                      | 3/3 | 0.73 $\pm$ 0.3   | 3/3 |
| CLDN12tv2 | 1 $\pm$ 0.31  | 3/3 | 0.88 $\pm$ 0.21              | 3/3 | 0.79 $\pm$ 0.35                      | 3/3 | 0.47 $\pm$ 0.35  | 3/3 |
| CLDN12tv3 | 1 $\pm$ 0.34  | 3/3 | 0.86 $\pm$ 0.17              | 3/3 | 0.79 $\pm$ 0.17                      | 3/3 | 0.79 $\pm$ 0.25  | 3/3 |

|             | Control   |     | INF                         |     | INF+Ibu      |     | Ibu          |     |
|-------------|-----------|-----|-----------------------------|-----|--------------|-----|--------------|-----|
| Marker      | mean ± SD | N   | mean ± SD                   | N   | mean ± SD    | N   | mean ± SD    | N   |
| CLDN14      | 1± 0.27   | 3/3 | 2.57± 0.9                   | 3/3 | 4.51± 1.11   | 2/3 | 1.51         | 1/3 |
| CLDN15      | 1± 0.16   | 3/3 | 0.76± 0.09                  | 3/3 | 0.75± 0.41   | 3/3 | 0.98± 0.96   | 3/3 |
| CLDN16      | 1± 0.22   | 3/3 | 0.3± 0.16                   | 3/3 | 0.42± 0.17   | 3/3 | 1.79± 1.1    | 3/3 |
| CLDN17      | 1± 0.35   | 3/3 | 0.56± 0.54                  | 3/3 | 0.87± 0.76   | 3/3 | 1.66± 1.15   | 3/3 |
| CLDN18tv2a  | 1± 0.09   | 3/3 | 3.74± 3.76                  | 3/3 | 6.78± 5.81   | 3/3 | 6.08± 8.62   | 3/3 |
|             |           |     |                             |     | **Control    |     | *Control     |     |
| CLDN20      | 1         | 1/3 | n/a                         | 0/3 | 2.35         | 1/3 | n/a          | 0/3 |
| CLDN21      | 1± 0.86   | 2/3 | 16.28± 21.78                | 3/3 | 23.81± 25.7  | 3/3 | 1.29         | 1/3 |
| CLDN22      | 1± 0.28   | 2/3 | 1.68± 0.73                  | 3/3 | 1.7± 1.42    | 3/3 | 0.4± 0.53    | 3/3 |
| CLDN24      | 1± 0.77   | 3/3 | 9.78± 5.33                  | 3/3 | 4.2± 3.5     | 3/3 | 0.62         | 1/3 |
| CLDN25tv1-4 | 1± 0.23   | 3/3 | 0.67± 0.34                  | 3/3 | 0.69± 0.44   | 3/3 | 0.65± 0.77   | 3/3 |
| CLDN25tv7   | 1± 0.73   | 3/3 | 1.76± 0.59                  | 3/3 | 1.44± 1.1    | 3/3 | 1.34± 0.38   | 2/3 |
| CLDN27      | 1± 0.23   | 3/3 | 5.05± 5.07                  | 3/3 | 12.04± 14.69 | 3/3 | 0.26         | 1/3 |
| JAM1        | 1± 0.1    | 3/3 | 0.59± 0.06                  | 3/3 | 0.5± 0.36    | 3/3 | 0.5± 0.67    | 3/3 |
| JAM2        | 1         | 1/3 | 1.34± 0.7                   | 3/3 | 2.71± 0.05   | 2/3 | 0.55         | 1/3 |
|             |           |     |                             |     | *Ibu         |     |              |     |
| JAM3        | 1         | 1/3 | 0.85± 0.5                   | 3/3 | 0.73         | 1/3 | n/a          | 0/3 |
| ZO-1        | 1± 0.2    | 3/3 | 0.98± 0.09                  | 3/3 | 0.93± 0.65   | 3/3 | 0.91± 0.81   | 2/3 |
| ZO-2        | 1± 0.24   | 3/3 | 1± 0.34                     | 3/3 | 0.79± 0.28   | 3/3 | 1.26± 0.5    | 3/3 |
| ZO-3        | 1± 0.09   | 3/3 | 0.07± 0.01                  | 3/3 | 0.03± 0.02   | 3/3 | 0.51± 0.84   | 3/3 |
| MARVELD2    | 1± 0.21   | 3/3 | 0.67± 0.2                   | 3/3 | 1.15± 0.35   | 3/3 | 2.92± 1.97   | 3/3 |
| OCLN        | 1± 0.31   | 3/3 | 0.25± 0.08                  | 3/3 | 0.99± 0.79   | 3/3 | 1.16± 1.05   | 2/3 |
| ABCB1       | 1         | 1/3 | 1.04± 0.67                  | 3/3 | 1.42± 0.62   | 3/3 | 1.01± 0.04   | 2/3 |
| ABCC1       | 1± 0.08   | 3/3 | 1.16± 0.24                  | 3/3 | 1.13± 0.23   | 3/3 | 1.26± 0.46   | 3/3 |
| ABCC2       | 1± 0.42   | 3/3 | 1.51± 0.48                  | 3/3 | 0.88± 0.47   | 3/3 | 0.7± 0.65    | 3/3 |
| ABCC3       | 1± 0.45   | 3/3 | 1.16± 0.20                  | 3/3 | 1.35± 0.74   | 3/3 | 0.97± 1.21   | 3/3 |
| ABCC4       | 1± 0.22   | 3/3 | 6.57± 1.77                  | 3/3 | 1.55± 0.87   | 3/3 | 1.46± 0.5    | 2/3 |
|             |           |     | ***Control,<br>INF+Ibu, Ibu |     |              |     |              |     |
| ABCC5       | 1± 0.1    | 3/3 | 0.32± 0.05                  | 3/3 | 0.37± 0.23   | 3/3 | 0.69± 0.34   | 3/3 |
| ABCG2       | 1± 0.49   | 3/3 | 0.44± 0.39                  | 3/3 | 0.11± 0.06   | 3/3 | 0.87± 1.23   | 2/3 |
| SLC2A1      | 1± 0.29   | 3/3 | 0.22± 0.05                  | 3/3 | 0.16± 0.06   | 3/3 | 0.4± 0.26    | 3/3 |
| SLC7A1      | 1± 0.12   | 3/3 | 0.52± 0.04                  | 3/3 | 0.61± 0.21   | 3/3 | 0.54± 0.49   | 3/3 |
| SLC7A5      | 1± 0.11   | 3/3 | 1.02± 0.23                  | 3/3 | 0.67± 0.55   | 3/3 | 0.56± 0.91   | 3/3 |
| SLC16A1     | 1± 0.26   | 3/3 | 0.83± 0.11                  | 3/3 | 0.59± 0.48   | 3/3 | 0.32± 0.48   | 3/3 |
| MFSD2A      | 1± 0.25   | 3/3 | 1.3± 0.57                   | 3/3 | 0.86± 0.58   | 3/3 | 0.85± 0.6    | 3/3 |
| INSR        | 1± 0.29   | 3/3 | 0.57± 0.13                  | 3/3 | 0.42± 0.24   | 3/3 | 0.52± 0.39   | 3/3 |
| LRP1        | 1± 0.17   | 3/3 | 0.4± 0.15                   | 3/3 | 0.21± 0.09   | 3/3 | 0.68± 0.36   | 3/3 |
| TFRC        | 1± 0.14   | 3/3 | 1.18± 0.21                  | 3/3 | 1.08± 0.81   | 3/3 | 0.79± 0.87   | 3/3 |
| CK1         | 1± 0.23   | 3/3 | 0.76± 0.22                  | 3/3 | 1.47± 1.84   | 3/3 | 11.98± 16.81 | 2/3 |
| CK4         | 1± 0.22   | 3/3 | 0.31± 0.11                  | 3/3 | 0.84± 0.48   | 3/3 | 1.53± 1.73   | 3/3 |
| CK5         | 1± 0.49   | 3/3 | 0.1± 0.04                   | 3/3 | 0.1± 0.05    | 3/3 | 0.27± 0.28   | 3/3 |
| CK7         | 1± 0.6    | 3/3 | 0.58± 0.23                  | 3/3 | 0.63± 0.28   | 3/3 | 3.07± 2.11   | 3/3 |
| CK8         | 1± 0.35   | 3/3 | 0.75± 0.3                   | 3/3 | 0.53± 0.3    | 3/3 | 0.92± 0.68   | 3/3 |
| CK10        | 1± 0.16   | 3/3 | 0.29± 0.15                  | 3/3 | 0.9± 1.03    | 3/3 | 1.63± 2.38   | 3/3 |
| CK13tv1     | 1± 0.06   | 3/3 | 0.12± 0.09                  | 3/3 | 0.22± 0.15   | 3/3 | 1.34± 0.93   | 3/3 |

|          | Control   |     | INF                                               |     | INF+Ibu                      |     | Ibu         |     |
|----------|-----------|-----|---------------------------------------------------|-----|------------------------------|-----|-------------|-----|
| Marker   | mean ± SD | N   | mean ± SD                                         | N   | mean ± SD                    | N   | mean ± SD   | N   |
| CK14     | 1± 0.13   | 3/3 | 0.73± 0.16                                        | 3/3 | 0.47± 0.12                   | 3/3 | 1.53± 0.93  | 3/3 |
| CK16     | 1± 0.09   | 3/3 | 0.23± 0.11                                        | 3/3 | 0.29± 0.17                   | 3/3 | 1.65± 1.22  | 2/3 |
| CK18     | 1± 0.23   | 3/3 | 1.03± 0.22                                        | 3/3 | 0.75± 0.32                   | 3/3 | 0.79± 0.85  | 3/3 |
| CK19     | 1± 0.22   | 3/3 | 1.18± 1.16                                        | 3/3 | 1.18± 0.93                   | 3/3 | 1.53± 0.26  | 2/3 |
| LOR      | 1± 0.46   | 3/3 | 0.49± 0.22                                        | 3/3 | 1.02± 0.85                   | 2/3 | 2.69± 2.89  | 2/3 |
| DSG3     | 1± 0.1    | 3/3 | 0.37± 0.16                                        | 3/3 | 0.47± 0.25                   | 3/3 | 0.83± 0.85  | 3/3 |
| AMY      | 1± 0.48   | 3/3 | 0.79± 0.17                                        | 3/3 | 0.46± 0.22                   | 3/3 | 0.38± 0.43  | 2/3 |
| CDH1     | 1± 0.32   | 3/3 | 1.13± 0.42                                        | 3/3 | 0.94± 0.55                   | 3/3 | 0.93± 0.62  | 3/3 |
| PECAM1   | 1± 0.28   | 3/3 | 0.82                                              | 1/3 | 0.47± 0.06                   | 2/3 | 0.77        | 1/3 |
| VEGF-A   | 1± 0.24   | 3/3 | 0.23± 0.04                                        | 3/3 | 0.24± 0.01                   | 3/3 | 0.5± 0.27   | 3/3 |
| VIM      | 1± 0.73   | 3/3 | 0.58± 0.42                                        | 3/3 | 0.91± 0.76                   | 3/3 | 0.56± 0.52  | 3/3 |
| VWF      | 1± 0.89   | 3/3 | 0.24± 0.28                                        | 3/3 | 0.24± 0.1                    | 3/3 | 1.28        | 1/3 |
| MUC1A    | 1± 0.62   | 3/3 | 3.43± 1.52                                        | 3/3 | 1.5± 0.78                    | 3/3 | 0.53± 0.42  | 3/3 |
| MUC1B    | 1± 0.6    | 3/3 | *Ibu<br>6.73± 2.78<br>***Control,<br>INF+Ibu, Ibu | 3/3 | 2.77± 1.69                   | 3/3 | 0.81± 0.36  | 3/3 |
| MUC3A    | 1± 0.98   | 3/3 | 2.71± 3.16                                        | 2/3 | 1.26± 1.06                   | 2/3 | 2.34± 2.52  | 2/3 |
| MUC5AC   | 1± 0.2    | 2/3 | 1.85                                              | 1/3 | 1.25                         | 1/3 | 0.76± 0.17  | 2/3 |
| MUC15tv2 | 1± 0.42   | 3/3 | 0.09± 0.08                                        | 2/3 | 0.09± 0.02                   | 3/3 | 0.46± 0.21  | 2/3 |
| MUC16    | n/a       | 0/3 | n/a                                               | 0/3 | n/a                          | 0/3 | n/a         | 0/3 |
| MUC18    | 1± 0.09   | 3/3 | 4.63± 2.68                                        | 3/3 | 1.81± 1.68                   | 3/3 | 0.89± 0.56  | 3/3 |
| MUC20    | 1± 0.54   | 3/3 | 0.82± 0.29                                        | 3/3 | 0.62± 0.35                   | 3/3 | 1.43± 0.61  | 3/3 |
| MUC21    | 1± 0.83   | 2/3 | 0.56± 0.23                                        | 3/3 | 0.67± 0.65                   | 3/3 | 1.65± 0.86  | 2/3 |
| AQP1     | 1± 0.2    | 3/3 | 0.14± 0.06                                        | 2/3 | 0.28                         | 1/3 | 0.34± 0.19  | 2/3 |
| AQP3     | 1± 0.26   | 3/3 | 0.37± 0.12                                        | 3/3 | 0.21± 0.05                   | 3/3 | 0.76± 0.67  | 3/3 |
| AQP5     | 1± 0.33   | 3/3 | 0.43± 0.07                                        | 3/3 | 0.21± 0.11                   | 3/3 | 1.57± 1.16  | 3/3 |
| AQP9     | 1± 0.72   | 3/3 | 9.94± 3.87<br>***Control,<br>INF+Ibu, Ibu         | 3/3 | 4.35± 3.41<br>**Control, Ibu | 3/3 | 0.93± 0.04  | 2/3 |
| AQP10    | 1± 0.07   | 3/3 | 0.56± 0.22                                        | 3/3 | 0.17± 0.12                   | 3/3 | 1.38± 0.72  | 2/3 |
| AQP11    | 1 ± 0.18  | 3/3 | 0.61 ± 0.19                                       | 3/3 | 0.34 ± 0.06                  | 3/3 | 0.66 ± 0.07 | 2/3 |

**Table S3.** Overview of physicochemical properties of NSAIDs, accessed on public databases, and calculated permeability coefficients of NSAIDs in this study.

| NSAID      | XlogP3 <sup>1</sup> | XlogD <sup>2</sup> | Permeability coefficient<br>without inflammation and inhibitor |
|------------|---------------------|--------------------|----------------------------------------------------------------|
| Celecoxib  | 3.4                 | 4.01               | 0.44 ± 0.19 µm/min                                             |
| Diclofenac | 4.4                 | 1.1                | 3.64 ± 0.84 µm/min                                             |
| Ibuprofen  | 3.5                 | 1.34               | 5.77 ± 1.48 µm/min                                             |
| Piroxicam  | 3.1                 | - 1.52             | 4.86 ± 2.41 µm/min                                             |

<sup>1</sup><https://pubchem.ncbi.nlm.nih.gov> (01.04.2024) <sup>2</sup><https://ebi.ac.uk> (02.04.2024)

## References

1. Lin GC, Leitgeb T, Vladetic A, Friedl H-P, Rhodes N, Rossi A, et al. Optimization of an oral mucosa in vitro model based on cell line TR146. *Tissue barriers*. 2020 Apr;8(2):1748459.
2. Mineta K, Yamamoto Y, Yamazaki Y, Tanaka H, Tada Y, Saito K, et al. Predicted expansion of the claudin multigene family. *FEBS Lett*. 2011 Feb;585(4):606–12.
